# Supplementary material for: Bioactive peptide release and the absorption tracking of casein in the gastrointestinal digestion of rats
Source: Royal Society of Chemistry journal article supplement (doi:10.1039/d1fo00356a), 2021-01-01
Supplement: d1fo00356a2.xlsx [file d1fo00356a2.xlsx]

## Sheet: peptide derived from beta-CN
1	QPLPPTV
2	HQPLPPT
3	HLPLPLL
4	HLPLPLLQ
5	VYPFPGPIPN
6	LPPTVMFPPQ
7	TPVVVPPFLQP
8	PQNIPPLTQTP
9	PVVVPPFLQPE
10	LPPTVMFPPQS
11	QPHQPLPPTVM
12	PVVVPPFLQPEV
13	TPVVVPPFLQPE
14	QPLPPTVMFPPQ
15	IPPLTQTPVVVPP
16	TPVVVPPFLQPEV
17	QTPVVVPPFLQPE
18	QPLPPTVMFPPQS
19	QTPVVVPPFLQPEV
20	TQTPVVVPPFLQPE
21	QPHQPLPPTVMFPPQS

## Sheet: peptide derived fromalpha-CN
1	YKVPQL
2	YPELFR
3	LGYLEQL
4	VAPFPEVF
5	PFPEVFGK
6	FYPELFR
7	APFPEVFGK
8	GYLEQLLR
9	VAPFPEVFGK
10	LGYLEQLLR
	11	AYFYPELFR
	12	FVAPFPEVFGK
	13	YPELFRQFY
	14	HIQKEDVPSER
	15	EPMIGVNQELAYF
	16	HQGLPQEVLNENL
	17	HPIKHQGLPQEVLNENL
	18	PMIGVNQELAYFYPELF
	19	KHQGLPQEVLNENLL

## Sheet: peptide derived from kappa-CN
1	AKPAAVR
2	SPAQILQW
3	YPSYGLNYY
4	INNQFLPYPY
5	SPAQILQWQVL
6	VRSPAQILQWQVL
7	SPAQILQWQVLSNTVPAK
8	YQQKPVALINNQFLPYPY
